# Supplementary material for: Immune network dysregulation precedes clinical diagnosis of asthma
Source: PubMed Central journal article supplement (PMC7393349; doi:10.1038/s41598-020-69494-x), 2020-07-30
Supplement: 41598_2020_69494_MOESM2_ESM.pdf [file 41598_2020_69494_MOESM2_ESM.pdf]

Rval – Asthma Network

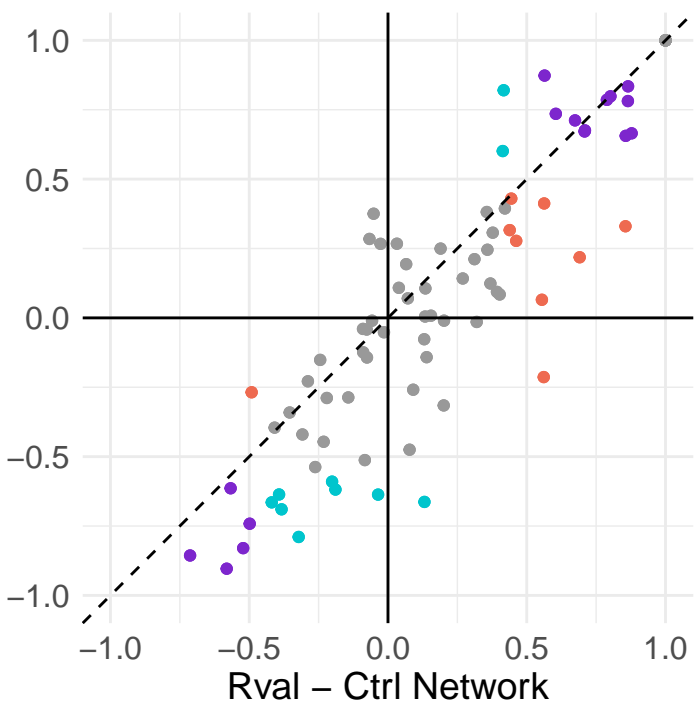

Edge significance

- Both
- Ctrl only
- Asthma only
- Neither
