# Supplementary material for: Immune network dysregulation precedes clinical diagnosis of asthma
Source: PubMed Central journal article supplement (PMC7393349; doi:10.1038/s41598-020-69494-x), 2020-07-30

# Regulatory differences of Controls vs Asthma per TF

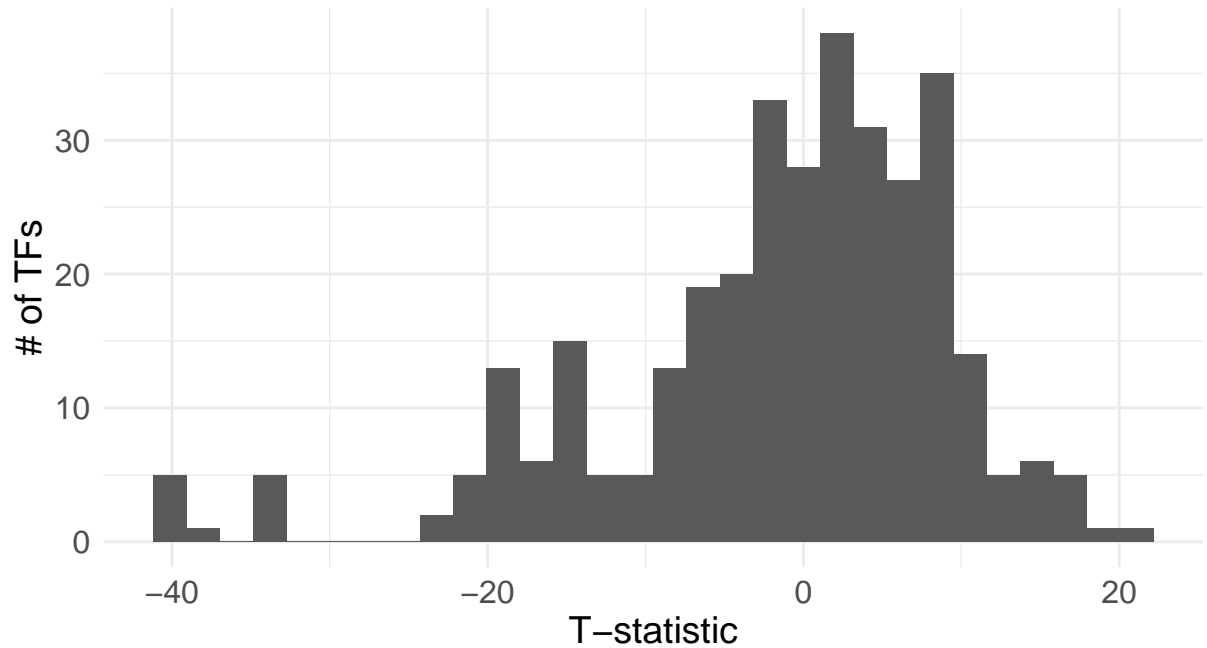

Supplement: 41598_2020_69494_MOESM3_ESM.pdf [file 41598_2020_69494_MOESM3_ESM.pdf]
